# Supplementary material for: Viscoelastic Relaxation of Polymerized Ionic Liquid and Lithium Salt Mixtures: Effect of Salt Concentration
Source: MDPI journal article supplement (doi:10.3390/polym13111772), 2021-05-28
Supplement: s1 [file s1]

**Supplementary Information for**

## **Viscoelastic Relaxation of Polymerized Ionic Liquid and Lithium Salt Mixtures: Effect of Salt Concentration**

Arisa Yokokoji<sup>1</sup>, Wakana Kitayama<sup>1</sup>, Kamonthira Wichai<sup>1,2</sup>, Osamu Urakawa<sup>1\*</sup>, Atsushi Matsumoto<sup>3</sup>, Visit Vao-soongnern<sup>2</sup>, Tadashi Inoue<sup>1\*</sup>

<sup>1</sup>Department of Macromolecular Science, Graduate School of Science, Osaka University, 1-3 Machikaneyama-cho, Toyonaka, Osaka 560-0043, Japan

<sup>2</sup>School of Chemistry, Institute of Science, Suranaree University of Technology, NakonRatchasima 30000, Thailand

<sup>3</sup> Department of Applied Chemistry and Biotechnology, University of Fukui, 3-9-1 Bunkyo, Fukui-shi, Fukui 910-8507, Japan

\*Correspondence: Email: urakawa@chem.sci.osaka-u.ac.jp;

Email: tadashi@chem.sci.osaka-u.ac.jp;

## 1. Van Gorp-Palmen-Plot

For the verification of the time-temperature superposition principle, we plotted the phase angle  $\delta$  of the measured rheological data against the corresponding absolute value of the complex shear modulus  $G^*$ , so-called van Gorp-Palmen-plot, for all the  $w_{\text{LiTFSI}}$  mixtures. The data measured at various temperatures converge in a single curve indicating the validity of the time-temperature superposition principle.

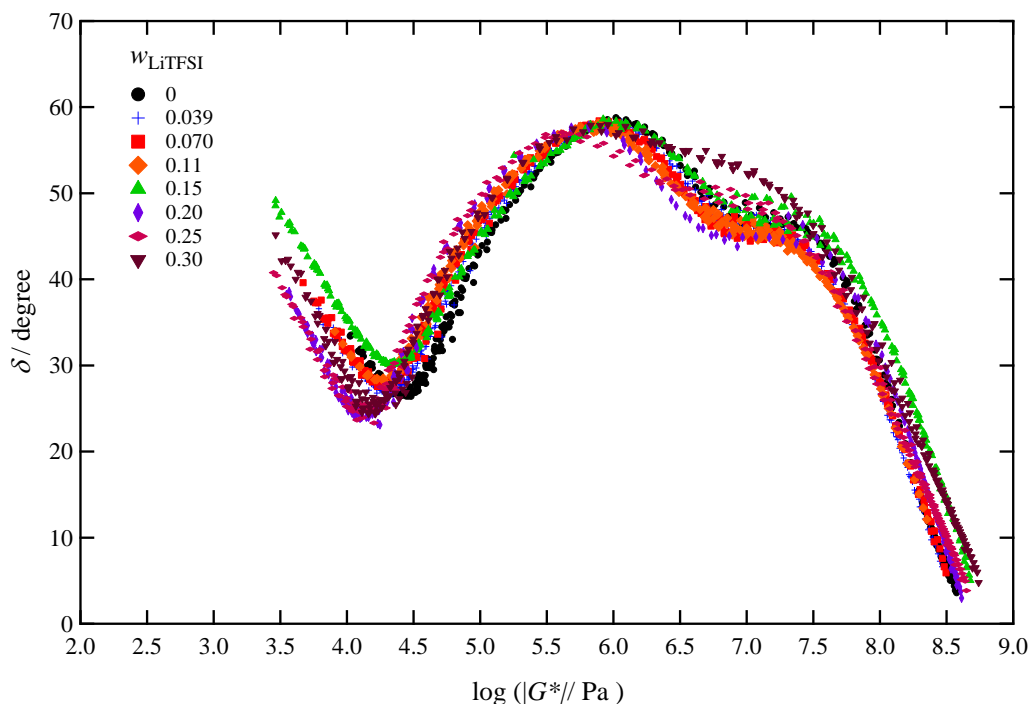

**Figure S1** Van Gorp-Palmen plot for PC<sub>4</sub>-TFSI / LiTFSI mixtures with  $w_{\text{LiTFSI}} \leq 0.3$ .

## 2. Vertical shift factors

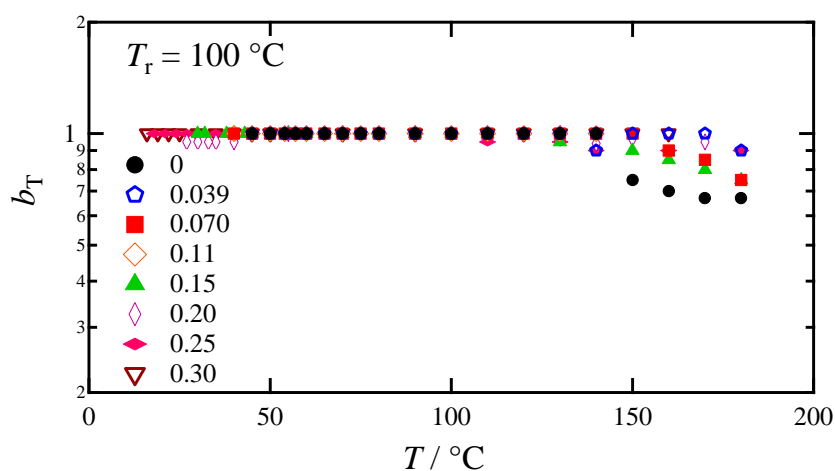

**Figure S2** Temperature dependence of the vertical shift factor  $b_T$  for PC<sub>4</sub>-TFSI / LiTFSI mixtures with  $w_{\text{LiTFSI}} \leq 0.3$  at the reference temperature, 100°C.

### 3. Failure of Time-Temperature Superposition Principle

For the inhomogeneous mixtures ( $w_{\text{LiTFSI}} = 0.35$  and  $0.40$ ), the time-temperature superposition principle (tTS) fails. Figure S2(a) shows the master curves of  $G^*$  and  $\tan \delta$  constructed using only the superposable part. The tTS holds for the high-temperature and low-frequency data but fails for the low-temperature and high-frequency data (especially in the  $\tan \delta$  data). Figure S2(b) displays van Gurp-Palmen-plot, which clearly shows the failuar of tTS. These results suggest that the temperature change induced the structural change, e.g. change of the degree of crystallinity.

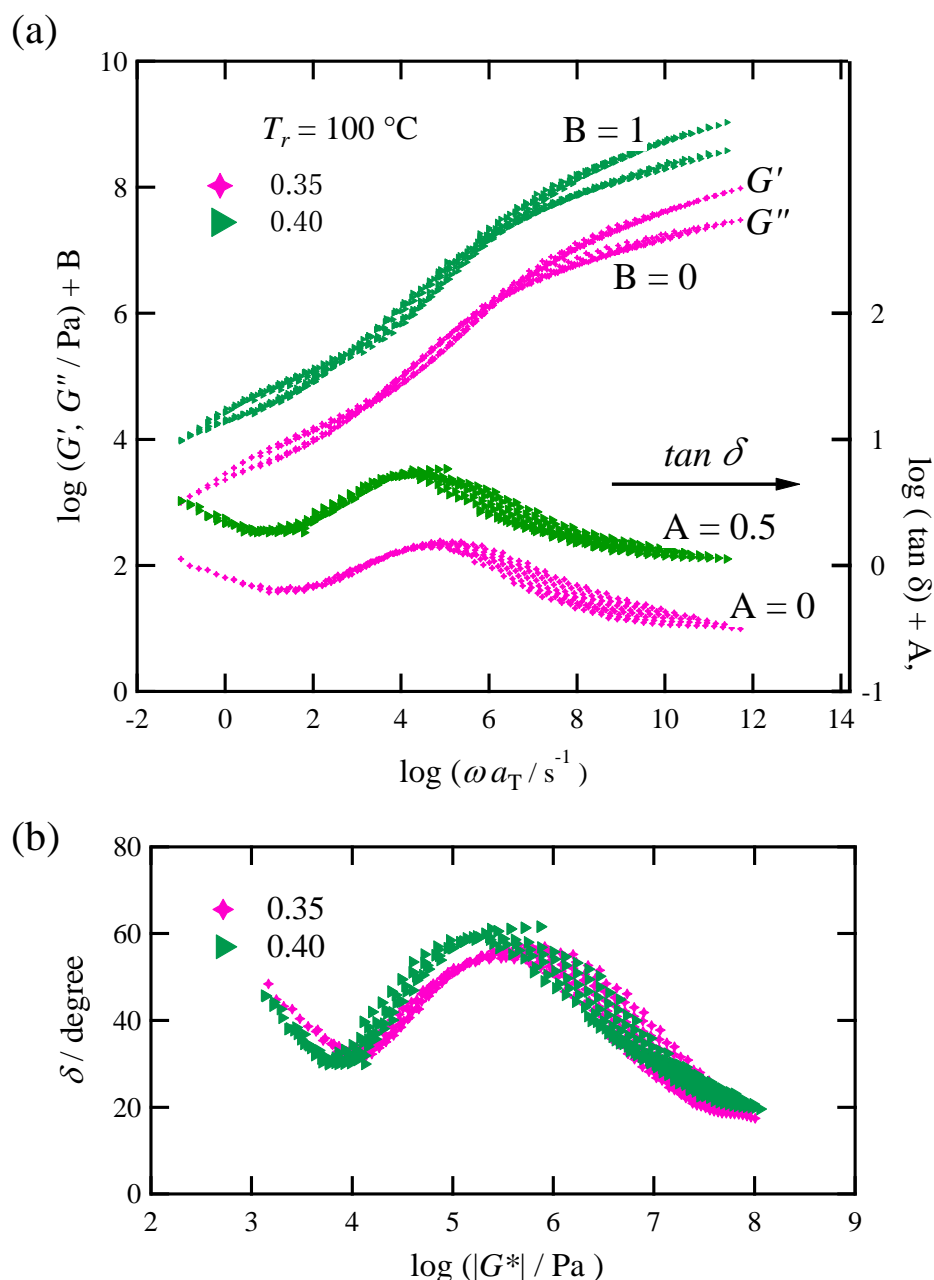

**Figure S3** (a) Reduced frequency  $\omega a_T$  dependence of  $G'$ ,  $G''$  and  $\tan \delta$  curves at the reference temperature,  $100^\circ\text{C}$ , and (b) the corresponding van Gurp-Palmen-plot for PC<sub>4</sub>-TFSI / LiTFSI mixtures with  $w_{\text{LiTFSI}} = 0.35$  and  $0.40$
